# Supplementary material for: Bacteriophage-Insensitive Mutants of Antimicrobial-Resistant Salmonella Enterica are Altered in their Tetracycline Resistance and Virulence in Caco-2 Intestinal Cells
Source: PubMed Central journal article supplement (PMC7084636; doi:10.3390/ijms21051883), 2020-03-10

1 SUPPLEMENTARY MATERIALS

2

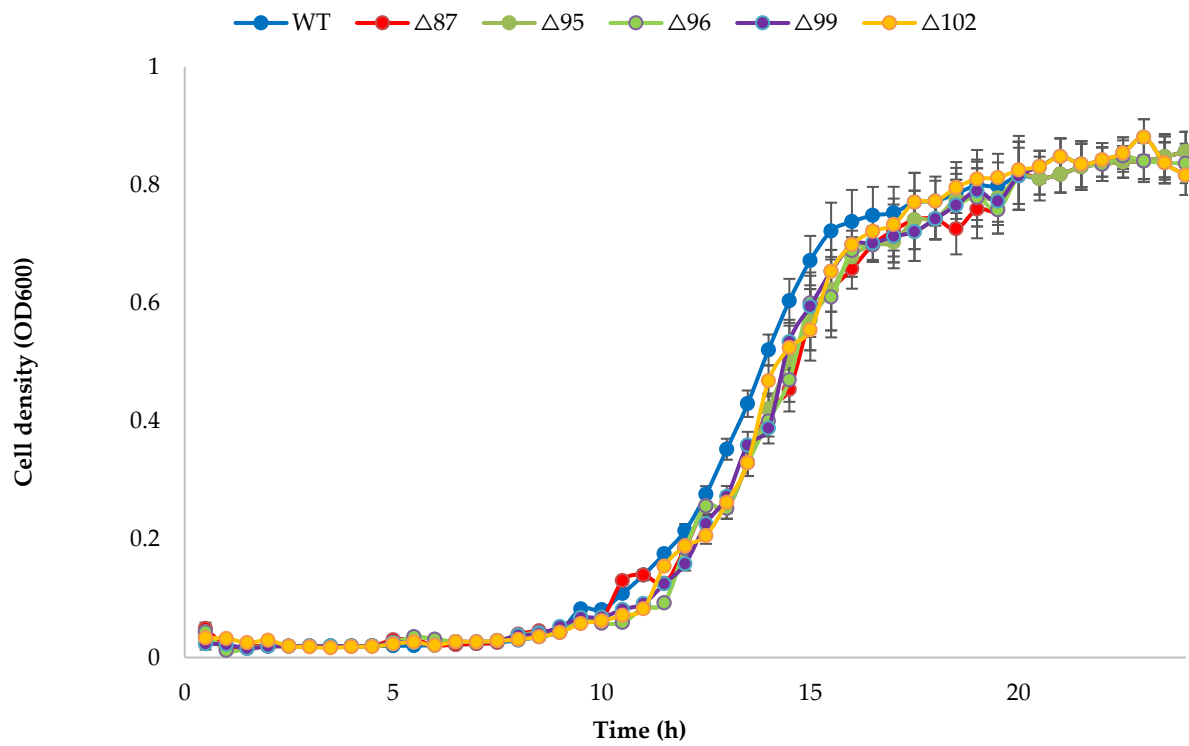

3

4 **Figure S1.** Relative growth rates of the parental and BIM isolates of *S. Agona* FSL S5-517. Data shown are the means  
5 of three biological replicates  $\pm$  S

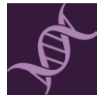

7 **Table S1.** Mutated genes identified in *S. Agona* BIM Δ87. Mutations shown possess a quality score of >20 and a mapping coverage of >8.

| Scaffold | Gene              | Strand | Protein/function               | Type <sup>a</sup> | Sequence            | Alternative sequence <sup>b</sup> | nt position <sup>c</sup> | Impact on polypeptide |
|----------|-------------------|--------|--------------------------------|-------------------|---------------------|-----------------------------------|--------------------------|-----------------------|
| 1.1      | <i>ccmA</i>       | -      | ATP-binding export protein     | SNP               | A                   | A>G                               | 609                      | None                  |
| 1.1      | <i>ccmC</i>       | -      | Heme exporter protein          | SNP               | C                   | C>T                               | 240                      | None                  |
| 1.1      | <i>ccmC</i>       | -      | Heme exporter protein          | MNP               | TGTCATTCATTAC       | CGTAATGCAGTAA                     | 521-531                  | None                  |
| 1.1      | Non-coding region | N/A    | Non-coding                     | Insertion         | TAAAAAA             | TGCGAAA                           | 611308                   | N/A                   |
| 1.1      | Non-coding region | N/A    | Non-coding                     | SNP               | T                   | T>G                               | 661695                   | N/A                   |
| 2.1      | Non-coding region | N/A    | Non-coding                     | SNP               | A                   | A>T                               | 479242                   | N/A                   |
| 3.1      | 16S rRNA          | +      | Ribosomal structure            | SNP               | T                   | T>C                               | 468                      | None                  |
| 3.1      | <i>orfA</i>       | -      | Transposase                    | Insertion         | TCCCGCTGACACCCGTCAG | TCCCGCTGACACCCGTTATGGC<br>ATTCAG  | 245                      | Frameshift            |
| 4.1      | Non-coding region | N/A    | Non-coding                     | SNP               | G                   | G>T                               | 44                       | N/A                   |
| 4.1      | Non-coding region | N/A    | Non-coding                     | SNP               | T                   | T>A                               | 66                       | N/A                   |
| 5.1      | <i>ccmH_1</i>     | -      | Cytochrome biogenesis protein  | SNP               | A                   | A>C                               | 446                      | None                  |
| 6.1      | <i>astA</i>       | -      | Arginine N-succinyltransferase | SNP               | C                   | C>T                               | 736                      | His → Tyr             |
| 6.1      | Non-coding region | N/A    | Non-coding                     | MNP               | TT                  | TT>AC                             | 111166                   | N/A                   |
| 6.1      | Non-coding region | N/A    | Non-coding                     | SNP               | T                   | T>A                               | 111173                   | N/A                   |

|      |                   |     |                                                              |           |               |                                |        |                                     |
|------|-------------------|-----|--------------------------------------------------------------|-----------|---------------|--------------------------------|--------|-------------------------------------|
|      | region            |     |                                                              |           |               |                                |        |                                     |
| 6.1  | Non-coding region | N/A | Non-coding                                                   | SNP       | C             | C>A                            | 111174 | N/A                                 |
| 6.1  | Non-coding region | N/A | Non-coding                                                   | SNP       | A             | A>C                            | 111176 | N/A                                 |
| 6.1  | Non-coding region | N/A | Non-coding                                                   | SNP       | T             | T>A                            | 113528 | N/A                                 |
| 6.1  | Non-coding region | N/A | Non-coding                                                   | Insertion | GTGAATGAAGGAT | GTGTAATAACGGAT                 | 113529 | N/A                                 |
| 6.1  | Non-coding region | N/A | Non-coding                                                   | Insertion | ACTTA         | AATATCTTATTTGCAGTGGTGAC<br>CCA | 113545 | N/A                                 |
| 6.1  | <i>solA</i>       | +   | N-methyl-L-tryptophan oxidase                                | SNP       | T             | T>G                            | 543    | None                                |
| 6.1  | <i>sufD</i>       | -   | FeS cluster assembly protein                                 | SNP       | G             | G>C                            | 846    | Trp → Cys                           |
| 7.1  | <i>argS</i>       | -   | Arginine -tRNA ligase                                        | SNP       | G             | G>T                            | 1034   | Arg → Leu                           |
| 7.1  | <i>cmoB</i>       | -   | tRNA U34 carboxymethyltransferase                            | SNP       | T             | T>A                            | 241    | Ser → Thr                           |
| 7.1  | <i>narJ</i>       | +   | Nitrate reductase molybdenum cofactor assembly chaperone     | SNP       | G             | G>C                            | 424    | Val → Leu                           |
| 7.1  | <i>vgrG1_2</i>    | +   | Tip protein/secreted effector; involved in Type VI secretion | Insertion | TT            | TCAAGGAT                       | 792    | Frameshift                          |
| 7.1  | <i>vgrG1_2</i>    | +   | Tip protein/secreted effector; involved in Type VI secretion | MNP       | ATTTT         | ATTTT>CGGCC                    | 798    | Leu → Phe<br>Phe → Gly<br>Tyr → His |
| 8.1  | <i>IS256</i>      | -   | Transposase                                                  | SNP       | G             | G>A                            | 75     | None                                |
| 8.1  | Non-coding region | N/A | Non-coding                                                   | SNP       | T             | T>G                            | 50489  | N/A                                 |
| 12.1 | <i>purL</i>       | -   | Phosphoribosylformylglycinamide                              | SNP       | C             | C>A                            | 1428   | Asp → Glu                           |

|      |                   |     |                               |           |            |                     |           |            |
|------|-------------------|-----|-------------------------------|-----------|------------|---------------------|-----------|------------|
|      |                   |     | synthase                      |           |            |                     |           |            |
| 26.1 | <i>impA</i>       | -   | Involved in Type IV secretion | Insertion | CTCCC      | CTCCGTAGC           | 767       | Frameshift |
| 28.1 | Non-coding region | N/A | Non-coding                    | SNP       | A          | A>T                 | 26        | N/A        |
| 29.1 | Non-coding region | N/A | Non-coding                    | SNP       | A          | A>G                 | 2251      | N/A        |
| 30.1 | 23S rRNA          | +   | Ribosomal structure           | Insertion | TG         | TCG                 | 505       | Frameshift |
| 30.1 | 23S rRNA          | +   | Ribosomal structure           | SNP       | TG         | TG>TA               | 506       | None       |
| 30.1 | Non-coding region | N/A | Non-coding                    | MNP       | CGGCCG     | CGGCCG>CCGAT        | 1040      | N/A        |
| 30.1 | Non-coding region | N/A | Non-coding                    | Insertion | AGCGAACGGG | AGCCAGAACGGG        | 1045      | N/A        |
| 30.1 | Non-coding region | N/A | Non-coding                    | Insertion | TGT        | TCGT                | 2266      | N/A        |
| 40.1 | 16S rRNA          | -   | Ribosomal structure           | MNP       | GGAAGTTTT  | GGAAGTTTT>AGAACTTTC | 1287-1296 | None       |

8 <sup>a</sup> SNPs clustered in close proximity (i.e., MNPs) are shown on a single line for clarity.

9 <sup>b</sup> In substitutions, alternate sequences are preceded by the original sequence and separated with a ">" symbol.

10 <sup>c</sup> Positions are shown for mutations occurring in genes. Positions in the scaffold are shown for mutations occurring in non-coding regions.

11

12

13

14

15

16

17

**18 Table S2.** Mutated genes identified in *S. Agona* BIM Δ95. Mutations shown possess a quality score of >20 and a mapping coverage of >8.

| Scaffold | Gene              | Strand | Protein/function                            | Type <sup>a</sup> | Sequence      | Alternative sequence <sup>b</sup> | nt position <sup>c</sup> | Impact on polypeptide |
|----------|-------------------|--------|---------------------------------------------|-------------------|---------------|-----------------------------------|--------------------------|-----------------------|
| 1.1      | <i>ccmC</i>       | -      | Heme exporter protein                       | SNP               | C             | C>T                               | 246                      | None                  |
| 1.1      | <i>ccmC</i>       | -      | Heme exporter protein                       | SNP               | G             | G>C                               | 278                      | Ala → Pro             |
| 1.1      | <i>ccmC</i>       | -      | Heme exporter protein                       | SNP               | G             | G>A                               | 357                      | None                  |
| 1.1      | <i>ccmC</i>       | -      | Heme exporter protein                       | MNP               | TGTCATTCATTAC | TGTCATTCATTAC>GGTTATCCACTAT       | 522-534                  | None                  |
| 1.1      | <i>ccmC</i>       | -      | Heme exporter protein                       | SNP               | T             | T>C                               | 540                      | None                  |
| 1.1      | <i>ccmC</i>       | -      | Heme exporter protein                       | SNP               | G             | G>A                               | 569                      | None                  |
| 1.1      | <i>ccmC</i>       | -      | Heme exporter protein                       | SNP               | G             | G>A                               | 574                      | Arg → Gln             |
| 1.1      | <i>ccmC</i>       | -      | Heme exporter protein                       | SNP               | C             | C>T                               | 588                      | None                  |
| 1.1      | <i>ccmD</i>       | -      | Heme exporter protein                       | SNP               | G             | G>A                               | 122                      | Arg → Gln             |
| 1.1      | <i>ccmD</i>       | -      | Heme exporter protein                       | SNP               | C             | C>G                               | 168                      | None                  |
| 1.1      | <i>ccmH_2</i>     | -      | Cytochrome biogenesis protein               | SNP               | G             | G>A                               | 132                      | None                  |
| 1.1      | Non-coding region | N/A    | N/A                                         | SNP               | A             | A>C                               | 661695                   | N/A                   |
| 1.1      | <i>rfaL</i>       | +      | O-antigen ligase                            | Insertion         | GA            | GGATA                             | 425                      | Insertion             |
| 1.1      | <i>rfaL</i>       | +      | O-antigen ligase                            | SNP               | G             | G>A                               | 429                      | None                  |
| 1.1      | <i>rfaL</i>       | +      | O-antigen ligase                            | Insertion         | TA            | TGGGA                             | 442                      | Insertion             |
| 1.1      | <i>rfaY</i>       | -      | Lipopolysaccharide core heptose (II) kinase | Insertion         | AA            | AGCGAAGCCCTAAACTTGTTAAAAA         | 514                      | Frameshift            |
| 1.1      | <i>rfaY</i>       | -      | Lipopolysaccharide core heptose (II) kinase | SNP               | T             | T>G                               | 538                      | Asp → Lys             |

|     |                   |     |                                                              |           |            |                     |      |                                     |
|-----|-------------------|-----|--------------------------------------------------------------|-----------|------------|---------------------|------|-------------------------------------|
| 1.1 | <i>rfaY</i>       | -   | Lipopolysaccharide core heptose (II) kinase                  | Insertion | T          | TCAAGGA             | 792  | Frameshift                          |
| 3.1 | 23S rRNA          | +   | Ribosome structure                                           | Insertion | AAGCGTGTAG | AGGTAGCGTGCAATAG    | 1134 | Frameshift                          |
| 3.1 | 23S rRNA          | +   | Ribosome structure                                           | Insertion | GACT       | GAAGACAACAATTTTCACT | 1029 | Frameshift                          |
| 3.1 | <i>orfA</i>       | -   | Transposase/transposition                                    | Insertion | TG         | TGCAAAGAATG         | 246  | Frameshift                          |
| 4.1 | Non-coding region | N/A | N/A                                                          | SNP       | G          | G>T                 | 44   | N/A                                 |
| 4.1 | Non-coding region | N/A | N/A                                                          | SNP       | T          | T>A                 | 66   | N/A                                 |
| 6.1 | <i>astA</i>       | -   | Arginine N-succinyltransferase                               | SNP       | C          | C>T                 | 736  | His → Tyr                           |
| 6.1 | <i>solA</i>       | +   | N-methyl-L-tryptophan oxidase                                | SNP       | T          | T>G                 | 543  | None                                |
| 6.1 | <i>sufD</i>       | -   | FeS cluster assembly protein                                 | SNP       | G          | G>C                 | 846  | Trp → Cys                           |
| 7.1 | <i>argS</i>       | -   | Arginine -tRNA ligase                                        | SNP       | G          | G>T                 | 1034 | Arg → Leu                           |
| 7.1 | <i>cmoB</i>       | -   | tRNA U34 carboxymethyltransferase                            | SNP       | T          | T>A                 | 241  | Ser → Thr                           |
| 7.1 | <i>narJ</i>       | +   | Nitrate reductase molybdenum cofactor assembly chaperone     | SNP       | G          | G>C                 | 424  | Val → Leu                           |
| 7.1 | <i>vgrG1_2</i>    | +   | Tip protein/secreted effector; involved in Type VI secretion | Insertion | TT         | TCAAGGAT            | 792  | Frameshift                          |
| 7.1 | <i>vgrG1_2</i>    | +   | Tip protein/secreted effector; involved in Type VI secretion | MNP       | ATTTT      | ATTTT>CGGCC         | 798  | Leu → Phe<br>Phe → Gly<br>Tyr → His |
| 7.1 | <i>vgrG1_2</i>    | +   | Tip protein/secreted effector; involved in Type VI secretion | Insertion | AT         | AGAACT              | 810  | Frameshift                          |
| 7.1 | <i>vgrG1_2</i>    | +   | Tip protein/secreted effector; involved                      | Insertion | TC         | TCAC                | 816  | Frameshift                          |

|      |                   |     |                                                              |           |           |                |      |                        |
|------|-------------------|-----|--------------------------------------------------------------|-----------|-----------|----------------|------|------------------------|
|      |                   |     | in Type VI secretion                                         |           |           |                |      |                        |
| 7.1  | <i>vgrG1_2</i>    | +   | Tip protein/secreted effector; involved in Type VI secretion | SNP       | G         | G>C            | 820  | Gly → Arg              |
| 7.1  | <i>vgrG1_2</i>    | +   | Tip protein/secreted effector; involved in Type VI secretion | SNP       | G         | G>T            | 823  | Gly → Stop codon       |
| 7.1  | <i>vgrG1_2</i>    | +   | Tip protein/secreted effector; involved in Type VI secretion | SNP       | A         | A>G            | 825  | None                   |
| 7.1  | <i>vgrG1_2</i>    | +   | Tip protein/secreted effector; involved in Type VI secretion | Deletion  | AGGA      | A---           | 828  | Deletion               |
| 7.1  | <i>vgrG1_2</i>    | +   | Tip protein/secreted effector; involved in Type VI secretion | SNP       | C         | C>G            | 831  | Asp → Glu              |
| 7.1  | <i>vgrG1_2</i>    | +   | Tip protein/secreted effector; involved in Type VI secretion | SNP       | C         | C>A            | 836  | Ala → Glu              |
| 8.1  | <i>mukB</i>       | +   | Chromosome partition protein                                 | MNP       | CAAA      | CAAA>GAAG      | 1100 | Ala → Gly<br>Asn → Ser |
| 12.1 | <i>purL</i>       | -   | Phosphoribosylformylglycinamide synthase                     | SNP       | C         | C>A            | 1428 | Asp → Glu              |
| 26.1 | <i>impA</i>       | -   | Involved in Type IV secretion                                | Insertion | CTCCC     | CTCCGTAGC      | 767  | Frameshift             |
| 28.1 | Non-coding region | N/A | N/A                                                          | SNP       | A         | A>T            | 26   | N/A                    |
| 30.1 | 23S rRNA          | +   | Ribosome structure                                           | Insertion | TG        | TCG            | 505  | Frameshift             |
| 30.1 | Non-coding region | N/A | N/A                                                          | Insertion | GCGGCGAGC | GCGGCGATAGTAGC | 1039 | N/A                    |
| 34.1 | 16S rRNA          | +   | Ribosome structure                                           | Insertion | TC        | TAC            | 1477 | Frameshift             |

19 <sup>a</sup> SNPs clustered in close proximity (i.e., MNPs) are shown on a single line for clarity.

20 <sup>b</sup> In substitutions, alternate sequences are preceded by the original sequence and separated with a ">" symbol.

21 <sup>c</sup> Positions are shown for mutations occurring in genes. Positions in the scaffold are shown for mutations occurring in non-coding regions.

22

23

24 **Table S3.** Mutated genes identified in *S. Agona* BIM Δ96. Mutations shown possess a quality score of >20 and a mapping coverage of >8.

| Scaffold | Gene              | Strand | Protein/function              | Type <sup>a</sup> | Sequence      | Alternative sequence <sup>b</sup> | nt position <sup>c</sup> | Impact on polypeptide |
|----------|-------------------|--------|-------------------------------|-------------------|---------------|-----------------------------------|--------------------------|-----------------------|
| 1.1      | <i>ccmA</i>       | -      | ATP-binding export protein    | SNP               | A             | A>G                               | 609                      | None                  |
| 1.1      | <i>ccmC</i>       | -      | Heme exporter protein         | SNP               | C             | C>T                               | 246                      | None                  |
| 1.1      | <i>ccmC</i>       |        | Heme exporter protein         | SNP               | G             | G>C                               | 278                      | Ala → Pro             |
| 1.1      | <i>ccmC</i>       | -      | Heme exporter protein         | SNP               | G             | G>A                               | 357                      | None                  |
| 1.1      | <i>ccmC</i>       | -      | Heme exporter protein         | MNP               | TGTCATTCATTAC | TGTCATTCATTAC>GGTTATCCACTAT       | 522-534                  | None                  |
| 1.1      | <i>ccmC</i>       | -      | Heme exporter protein         | SNP               | C             | C>T                               | 588                      | None                  |
| 1.1      | <i>ccmC</i>       | -      | Heme exporter protein         | SNP               | G             | G>A                               | 574                      | Arg → Gln             |
| 1.1      | <i>ccmC</i>       | -      | Heme exporter protein         | SNP               | G             | G>A                               | 569                      | None                  |
| 1.1      | <i>ccmD</i>       | -      | Heme exporter protein         | SNP               | G             | G>A                               | 122                      | Arg → Gln             |
| 1.1      | <i>ccmE</i>       | -      | Cytochrome biogenesis protein | MNP               | TTAC          | TTAC>CTAT                         | 24                       | Arg → Trp             |
| 1.1      | Non-coding region | N/A    | N/A                           | SNP               | A             | A>C                               | 661695                   | N/A                   |
| 1.1      | Non-coding region | N/A    | N/A                           | SNP               | A             | A>C                               | 611313                   | N/A                   |
| 1.1      | <i>rfaL</i>       | +      | O-antigen ligase              | Insertion         | GA            | GGATA                             | 425                      | Insertion             |
| 1.1      | <i>rfaL</i>       | +      | O-antigen ligase              | SNP               | G             | G>A                               | 429                      | None                  |



|     |                   |     |                                                              |           |    |                           |        |            |
|-----|-------------------|-----|--------------------------------------------------------------|-----------|----|---------------------------|--------|------------|
| 1.1 | <i>rfaL</i>       | +   | O-antigen ligase                                             | Insertion | TA | TGGGA                     | 442    | Insertion  |
| 1.1 | <i>rfaY</i>       | -   | Lipopolysaccharide core heptose (II) kinase                  | Insertion | AA | AGCGAAGCCCTAAACTTGTTAAAAA | 514    | Frameshift |
| 1.1 | <i>rfaY</i>       | -   | Lipopolysaccharide core heptose (II) kinase                  | SNP       | T  | T>G                       | 538    | Asp → Lys  |
| 1.1 | <i>rfaY</i>       | -   | Lipopolysaccharide core heptose (II) kinase                  | Insertion | T  | TCAAGGA                   | 792    | Frameshift |
| 3.1 | <i>orfA</i>       | -   | Transposase/transposition                                    | Insertion | TG | TGCAAAGAATG               | 246    | Frameshift |
| 4.1 | Non-coding region | N/A | Non-coding                                                   | SNP       | G  | G>T                       | 44     | N/A        |
| 4.1 | Non-coding region | N/A | Non-coding                                                   | SNP       | T  | T>A                       | 66     | N/A        |
| 4.1 | Non-coding region | N/A | Non-coding                                                   | SNP       | C  | C>G                       | 334561 | N/A        |
| 5.1 | <i>ccmH_1</i>     | -   | Cytochrome biogenesis protein                                | SNP       | A  | A>C                       | 446    | None       |
| 6.1 | <i>astA</i>       | -   | Arginine N-succinyltransferase                               | SNP       | C  | C>T                       | 736    | His → Tyr  |
| 6.1 | <i>solA</i>       | +   | N-methyl-L-tryptophan oxidase                                | SNP       | T  | T>G                       | 543    | None       |
| 6.1 | <i>sufD</i>       | -   | FeS cluster assembly protein                                 | SNP       | G  | G>C                       | 846    | Trp → Cys  |
| 7.1 | <i>argS</i>       | -   | Arginine -tRNA ligase                                        | SNP       | G  | G>T                       | 1034   | Arg → Leu  |
| 7.1 | <i>cmoB</i>       | -   | tRNA U34 carboxymethyltransferase                            | SNP       | T  | T>A                       | 241    | Ser → Thr  |
| 7.1 | <i>narJ</i>       | +   | Nitrate reductase molybdenum cofactor assembly chaperone     | SNP       | G  | G>C                       | 424    | Val → Leu  |
| 7.1 | <i>vgrG1_2</i>    | +   | Tip protein/secreted effector; involved in Type VI secretion | Insertion | TT | TCAAGGAT                  | 792    | Frameshift |

|      |                   |     |                                                              |           |       |             |      |                                     |
|------|-------------------|-----|--------------------------------------------------------------|-----------|-------|-------------|------|-------------------------------------|
| 7.1  | <i>vgrG1_2</i>    | +   | Tip protein/secreted effector; involved in Type VI secretion | MNP       | ATTTT | ATTTT>CGGCC | 798  | Leu → Phe<br>Phe → Gly<br>Tyr → His |
| 7.1  | <i>vgrG1_2</i>    | +   | Tip protein/secreted effector; involved in Type VI secretion | Insertion | AT    | AGAACT      | 810  | Frameshift                          |
| 7.1  | <i>vgrG1_2</i>    | +   | Tip protein/secreted effector; involved in Type VI secretion | Insertion | TC    | TCAC        | 816  | Frameshift                          |
| 7.1  | <i>vgrG1_2</i>    | +   | Tip protein/secreted effector; involved in Type VI secretion | SNP       | G     | G>C         | 820  | Gly → Arg                           |
| 7.1  | <i>vgrG1_2</i>    | +   | Tip protein/secreted effector; involved in Type VI secretion | SNP       | G     | G>T         | 823  | Gly → Stop codon                    |
| 7.1  | <i>vgrG1_2</i>    | +   | Tip protein/secreted effector; involved in Type VI secretion | SNP       | A     | A>G         | 825  | None                                |
| 7.1  | <i>vgrG1_2</i>    | +   | Tip protein/secreted effector; involved in Type VI secretion | Deletion  | AGGA  | A---        | 828  | Frameshift                          |
| 7.1  | <i>vgrG1_2</i>    | +   | Tip protein/secreted effector; involved in Type VI secretion | SNP       | C     | C>G         | 831  | Asp → Glu                           |
| 7.1  | <i>vgrG1_2</i>    | +   | Tip protein/secreted effector; involved in Type VI secretion | SNP       | C     | C>A         | 836  | Ala → Glu                           |
| 12.1 | <i>purL</i>       | -   | Phosphoribosylformylglycinamidine synthase                   | SNP       | C     | C>A         | 1428 | Asp → Glu                           |
| 26.1 | <i>impA</i>       | -   | Involved in Type IV secretion                                | Insertion | CTCCC | CTCCGTAGC   | 767  | Frameshift                          |
| 28.1 | Non-coding region | N/A | N/A                                                          | SNP       | A     | A>T         | 26   | N/A                                 |

|      |                   |     |                    |           |           |                                     |      |            |
|------|-------------------|-----|--------------------|-----------|-----------|-------------------------------------|------|------------|
| 29.1 | Non-coding region | N/A | N/A                | Insertion | CAAC      | TATTACGTTTTGGCTGGTCAAC              | 3    | N/A        |
| 29.1 | Non-coding region | N/A | N/A                | Insertion | GTAC      | GTACAACCGAGGTGACTCGTGGCCGT<br>GATGG | 2248 | N/A        |
| 30.1 | Non-coding region | N/A | N/A                | Insertion | GCGGCGAGC | GCGGCGATAGTAGC                      | 1039 | N/A        |
| 34.1 | 16S rRNA          | +   | Ribosome structure | Insertion | TC        | TAC                                 | 1477 | Frameshift |
| 36.1 | Non-coding region | N/A | N/A                | Insertion | TGAG      | TGAGATTCCCCCAGTA                    | 742  | Frameshift |

25 <sup>a</sup> SNPs clustered in close proximity (i.e., MNPs) are shown on a single line for clarity.

26 <sup>b</sup> In substitutions, alternate sequences are preceded by the original sequence and separated with a ">" symbol.

27 <sup>c</sup> Positions are shown for mutations occurring in genes. Positions in the scaffold are shown for mutations occurring in non-coding regions.

28

29

30

31

32 **Table S4.** Mutated genes identified in *S. Agona* BIM Δ99. Mutations shown possess a quality score of >20 and a mapping coverage of >8.

| Scaffold | Gene        | Strand | Protein/function      | Type <sup>a</sup> | Sequence | Alternative sequence <sup>b</sup> | nt position <sup>c</sup> | Impact on polypeptide |
|----------|-------------|--------|-----------------------|-------------------|----------|-----------------------------------|--------------------------|-----------------------|
| 1.1      | <i>ccmC</i> | -      | Heme exporter protein | SNP               | C        | C>T                               | 246                      | None                  |
| 1.1      | <i>ccmC</i> | -      | Heme exporter protein | SNP               | G        | G>C                               | 278                      | Ser → Thr             |
| 1.1      | <i>ccmC</i> | -      | Heme exporter protein | SNP               | G        | G>A                               | 357                      | None                  |
| 1.1      | <i>ccmC</i> | -      | Heme exporter protein | SNP               | C        | C>T                               | 534                      | None                  |
| 1.1      | <i>ccmC</i> | -      | Heme exporter protein | SNP               | T        | T>C                               | 540                      | None                  |

|     |                   |     |                                                          |           |           |              |        |            |
|-----|-------------------|-----|----------------------------------------------------------|-----------|-----------|--------------|--------|------------|
| 1.1 | <i>ccmC</i>       | -   | Heme exporter protein                                    | SNP       | G         | G>A          | 570    | Ser → Tyr  |
| 1.1 | <i>ccmC</i>       | -   | Heme exporter protein                                    | SNP       | G         | G>A          | 575    | Arg → Leu  |
| 1.1 | <i>ccmC</i>       | -   | Heme exporter protein                                    | SNP       | C         | C>T          | 588    | None       |
| 1.1 | <i>ccmD</i>       | -   | Heme exporter protein                                    | SNP       | G         | G>A          | 122    | Arg → Gln  |
| 1.1 | <i>ccmE</i>       | -   | Cytochrome C maturation protein                          | SNP       | C         | C>T          | 228    | None       |
| 1.1 | <i>ccmE</i>       | -   | Cytochrome C maturation protein                          | SNP       | T         | T>C          | 249    | None       |
| 1.1 | <i>ccmE</i>       | -   | Cytochrome C maturation protein                          | SNP       | G         | G>T          | 268    | Ala → Ser  |
| 1.1 | Non-coding region | N/A | N/A                                                      | Deletion  | GCCCC     | G--C         | 611298 | Deletion   |
| 1.1 | Non-coding region | N/A | N/A                                                      | SNP       | A         | A>C          | 611314 | N/A        |
| 1.1 | Non-coding region | N/A | N/A                                                      | Insertion | TAGAGAAAC | TAGCCACGTAAC | 612552 | N/A        |
| 1.1 | Non-coding region | N/A | N/A                                                      | Insertion | GGGAGTTCA | GGATAATCTA   | 612566 | N/A        |
| 1.1 | Non-coding region | N/A | N/A                                                      | SNP       | T         | T>G          | 661695 | N/A        |
| 3.1 | <i>orfA</i>       | -   | Transposase/transposition                                | Insertion | TG        | TGCAAAGAATG  | 246    | Frameshift |
| 4.1 | <i>ycjG</i>       | +   | L-Ala-D/L-Glu epimerase                                  | SNP       | A         | A>T          | 296    | Gln → Leu  |
| 6.1 | <i>astA</i>       | (-) | Arginine N-succinyltransferase                           | SNP       | C         | C>T          | 736    | His → Tyr  |
| 6.1 | <i>chbC</i>       | -   | Selective sugar transport                                | SNP       | G         | G>A          | 275    | Gly → Asp  |
| 6.1 | Non-coding region | N/A | N/A                                                      | SNP       | T         | T>C          | 111167 | N/A        |
| 6.1 | <i>solA</i>       | (+) | N-methyl-L-tryptophan oxidase                            | SNP       | T         | T>G          | 543    | None       |
| 6.1 | <i>sufD</i>       | (-) | FeS cluster assembly protein                             | SNP       | G         | G>C          | 846    | Trp → Cys  |
| 7.1 | <i>argS</i>       | -   | Arginine -tRNA ligase                                    | SNP       | G         | G>T          | 1034   | Arg → Leu  |
| 7.1 | <i>cmoB</i>       | -   | tRNA U34 carboxymethyltransferase                        | SNP       | T         | T>A          | 241    | Ser → Thr  |
| 7.1 | <i>narJ</i>       | +   | Nitrate reductase molybdenum cofactor assembly chaperone | SNP       | G         | G>C          | 424    | Val → Leu  |

|      |                   |     |                                                                 |           |       |             |        |                                     |
|------|-------------------|-----|-----------------------------------------------------------------|-----------|-------|-------------|--------|-------------------------------------|
| 7.1  | Non-coding region | N/A | N/A                                                             | SNP       | C     | C>A         | 111169 | N/A                                 |
| 7.1  | <i>vgrG1_2</i>    | +   | Tip protein/secreted effector;<br>involved in Type VI secretion | Insertion | TT    | TCAAGGAT    | 792    | Frameshift                          |
| 7.1  | <i>vgrG1_2</i>    | (+) | Tip protein/secreted effector;<br>involved in Type VI secretion | MNP       | ATTTT | ATTTT>CGGCC | 798    | Leu → Phe<br>Phe → Gly<br>Tyr → His |
| 8.1  | <i>mukB</i>       | +   | Chromosome partition protein                                    | MNP       | CAAA  | CAAA>GAAG   | 1100   | Ala → Gly<br>Asn → Ser              |
| 8.1  | <i>nfsA</i>       |     | Oxygen-insensitive NADPH<br>nitroreductase                      | SNP       | A     | A>G         | 251    | Asn--> Ser                          |
| 8.1  | Non-coding region | N/A | N/A                                                             | SNP       | T     | T>C         | 111170 | N/A                                 |
| 8.1  | <i>ybjI</i>       | -   | 5-amino-6-(5-phospho-D-ribitylamin<br>o) uracil phosphatase     | Deletion  | GCGG  | G--G        | 718    | Frameshift                          |
| 9.1  | Non-coding region | N/A | N/A                                                             | SNP       | T     | T>C         | 111172 | N/A                                 |
| 10.1 | Non-coding region | N/A | N/A                                                             | SNP       | T     | T>G         | 111173 | N/A                                 |
| 11.1 | Non-coding region | N/A | N/A                                                             | SNP       | T     | T>C         | 111175 | N/A                                 |
| 12.1 | Non-coding region | N/A | N/A                                                             | SNP       | A     | A>G         | 111176 | N/A                                 |
| 13.1 | Non-coding region | N/A | N/A                                                             | SNP       | C     | C>T         | 111177 | N/A                                 |
| 30.1 | 23S rRNA          | +   | Ribosome structure                                              | MNP       | TCT   | TCT>TAG     | 842    | None                                |
| 34.1 | 16S rRNA          | +   | Ribosome structure                                              | Insertion | TC    | TAC         | 729    | Frameshift                          |

33 <sup>a</sup> SNPs clustered in close proximity (i.e., MNPs) are shown on a single line for clarity.

34 <sup>b</sup> In substitutions, alternate sequences are preceded by the original sequence and separated with a ">" symbol.

35 <sup>c</sup> Positions are shown for mutations occurring in genes. Positions in the scaffold are shown for mutations occurring in non-coding regions.

36 **Table S5.** Mutated genes identified in *S. Agona* BIM Δ102. Mutations shown possess a quality score of >20 and a mapping coverage of >8.

| Scaffold | Gene              | Strand | Protein/function                   | Type <sup>a</sup> | Sequence         | Alternative sequence <sup>b</sup> | nt position <sup>c</sup> | Impact on polypeptide |
|----------|-------------------|--------|------------------------------------|-------------------|------------------|-----------------------------------|--------------------------|-----------------------|
| 1.1      | <i>ccmA</i>       | -      | ATP-binding export protein         | SNP               | A                | A>G                               | 609                      | None                  |
| 1.1      | <i>ccmC</i>       | -      | Heme exporter protein              | SNP               | C                | C>T                               | 246                      | None                  |
| 1.1      | <i>ccmC</i>       | -      | Heme exporter protein              | SNP               | G                | G>C                               | 278                      | Ser → Thr             |
| 1.1      | <i>ccmC</i>       | -      | Heme exporter protein              | SNP               | G                | G>A                               | 357                      | None                  |
| 1.1      | <i>ccmC</i>       | -      | Heme exporter protein              | SNP               | C                | C>T                               | 534                      | None                  |
| 1.1      | <i>ccmC</i>       | -      | Heme exporter protein              | SNP               | T                | T>C                               | 540                      | None                  |
| 1.1      | <i>ccmC</i>       | -      | Heme exporter protein              | SNP               | G                | G>A                               | 570                      | Ser → Tyr             |
| 1.1      | <i>ccmC</i>       | -      | Heme exporter protein              | SNP               | G                | G>A                               | 575                      | Arg → Leu             |
| 1.1      | <i>ccmC</i>       | -      | Heme exporter protein              | SNP               | C                | C>T                               | 588                      | None                  |
| 1.1      | Non-coding region | N/A    | N/A                                | Insertion         | T                | G                                 | 661695                   | N/A                   |
| 1.1      | Non-coding region | N/A    | N/A                                | Insertion         | GCTACG           | GCGGCCTATCTCG                     | 612534                   | N/A                   |
| 3.1      | 23S rRNA          | +      | Ribosome structure                 | Insertion         | GACT             | GAAGACAACAATTTTC<br>ACT           | 1029                     | Frameshift            |
| 3.1      | Non-coding region | N/A    | N/A                                | Deletion          | TCAGATTCAGAGTCCG | TCA-----CCG                       | 2296                     | Frameshift            |
| 4.1      | Non-coding region | N/A    | Non-coding                         | SNP               | G                | G>T                               | 44                       | N/A                   |
| 4.1      | Non-coding region | N/A    | Non-coding                         | SNP               | T                | T>A                               | 66                       | N/A                   |
| 4.1      | <i>rsxC_1</i>     | +      | Electron transport complex subunit | SNP               | A                | A>G                               | 1911                     | Thr → Ala             |
| 5.1      | <i>ccmH_1</i>     | -      | Cytochrome biogenesis protein      | SNP               | A                | A>C                               | 447                      | None                  |

|      |                   |     |                                                              |           |           |                |        |                                     |
|------|-------------------|-----|--------------------------------------------------------------|-----------|-----------|----------------|--------|-------------------------------------|
| 6.1  | <i>astA</i>       | -   | Arginine N-succinyltransferase                               | SNP       | C         | C>T            | 736    | His → Tyr                           |
| 6.1  | Non-coding region | N/A | Non-coding                                                   | MNP       | TT        | TT>AC          | 111166 | N/A                                 |
| 6.1  | <i>sufD</i>       | -   | FeS cluster assembly protein                                 | SNP       | G         | G>C            | 846    | Trp → Cys                           |
| 7.1  | <i>argS</i>       | -   | Arginine -tRNA ligase                                        | SNP       | G         | G>T            | 1034   | Arg → Leu                           |
| 7.1  | <i>cmoB</i>       | -   | tRNA U34 carboxymethyltransferase                            | SNP       | T         | T>A            | 241    | Ser → Thr                           |
| 7.1  | <i>narJ</i>       | +   | Nitrate reductase molybdenum cofactor assembly chaperone     | SNP       | G         | G>C            | 424    | Val → Leu                           |
| 7.1  | <i>vgrG1_2</i>    | +   | Tip protein/secreted effector; involved in Type VI secretion | Insertion | TT        | TCAAGGAT       | 792    | Frameshift                          |
| 7.1  | <i>vgrG1_2</i>    | +   | Tip protein/secreted effector; involved in Type VI secretion | MNP       | ATTTT     | ATTTT>CGGCC    | 798    | Leu → Phe<br>Phe → Gly<br>Tyr → His |
| 12.1 | <i>purL</i>       | -   | Phosphoribosylformylglycinamide synthase                     | SNP       | C         | C>A            | 1428   | Asp → Glu                           |
| 26.1 | <i>icmF</i>       | -   | Type VI secretion                                            | SNP       | T         | T>G            | 87     | None                                |
| 26.1 | <i>icmF</i>       | -   | Type VI secretion                                            | SNP       | G         | G>A            | 78     | None                                |
| 28.1 | Non-coding region | N/A | N/A                                                          | SNP       | A         | A>T            | 26     | N/A                                 |
| 29.1 | Non-coding region | N/A | Non-coding                                                   | SNP       | A         | A>G            | 2251   | N/A                                 |
| 30.1 | Non-coding region | N/A | N/A                                                          | Insertion | GCGGCGAGC | GCGGCGATAGTAGC | 1039   | N/A                                 |
| 30.1 | Non-coding region | N/A | N/A                                                          | SNP       | G         | G>C            | 1052   | N/A                                 |

34.1 16S rRNA + Ribosome structure Insertion TC TAC 729 Frameshift

---

37 <sup>a</sup> SNPs clustered in close proximity (i.e., MNPs) are shown on a single line for clarity.

38 <sup>b</sup> In substitutions, alternate sequences are preceded by the original sequence and separated with a ">" symbol.

39 <sup>c</sup> Positions are shown for mutations occurring in genes. Positions in the scaffold are shown for mutations occurring in non-coding regions.

40

41

42

43 **Table S6.** CRISPR elements identified in scaffold 2.1 of the parent and BIM strains of *S. Agona* FSL S5-517.

| CRISPR start (nt) | CRISPR end (nt) | Spacer | Spacer sequence                   | Direct repeat consensus sequence |
|-------------------|-----------------|--------|-----------------------------------|----------------------------------|
|                   |                 | 1      | TTTTCAGCCCTTGCCGACTGCGGAACGCCCT   |                                  |
|                   |                 | 2      | ATGGATGGCTCATATCCGGTTTCTGTTTCTGC  |                                  |
|                   |                 | 3      | GCGAAATAGTGGGGAAAAACCCCTGGTTAACC  |                                  |
|                   |                 | 4      | TAGGCCTTGATACCATCGCTCGCACCTCGTCA  |                                  |
|                   |                 | 5      | ATATTGATACTGTTCTCAAGCGCCGTTTAGC   |                                  |
|                   |                 | 6      | TGGCGCCAGAAATATTCATGATCATCGGGATT  |                                  |
| 191881            | 193007          | 7      | TTCATATTCAGAAAATGCCTGGGTGATGATC   | CGGTTTATCCCCGCTGGCGCGGGGAACAC    |
|                   |                 | 8      | GTGGTATCTCCTGTCGACCTTGCCGTTAAAAT  |                                  |
|                   |                 | 9      | TATAACTGGCGGGTTTTAGTGTCTGTTATAAAA |                                  |
|                   |                 | 10     | TCAGGCTTGACGACAGTCTCCAGCCACTCCTG  |                                  |
|                   |                 | 11     | GACCGCGCGGGCTATCGTTCAGGACTATTTTT  |                                  |
|                   |                 | 12     | TGGAAGATATTGAAAGCGCCCAATCTTCCCAG  |                                  |
|                   |                 | 13     | CTCTGTTACACCGTTATGCACAGACCACACAG  |                                  |
|                   |                 | 14     | NTTAATGCAAGCGCCATTAACAAGAAAATGAC  |                                  |



15 AGCTCCGGCAGGGTCATGTCCCAGGTCAGGTCG  
 16 GTTGTGACGAGTTCGTCGCTTTTTTTTTCGCT  
 17 TAGGGAACCTGGCTAAAGTGTCTGAAGGCTAC  
 18 AATTTTTCTGCGGCCAGCGCGGCCAGCGCCTC

|        |        |   |                                  |                               |
|--------|--------|---|----------------------------------|-------------------------------|
| 209293 | 209809 | 1 | CTGCTCAGCGATAACCGGCAGGTTTAGCCGCT | CGGTTTATCCCCGCTGGCGCGGGGAACAC |
|        |        | 2 | TTGCCGACCAGATCAATGACAACGCTAACCTT |                               |
|        |        | 3 | CAGATCACAACGGGTGACGTGATTTTTGGAAA |                               |
|        |        | 4 | TCGTTTTTATCTGCATCTCACTCCCCCTAAC  |                               |
|        |        | 5 | GCCTAAGCCGGGATTTGCTTTAGGCCAGTTGG |                               |
|        |        | 6 | AATAAATGGGATGATCCTGTTGTCCGGGATGC |                               |
|        |        | 7 | TCCATCGCTTTTGCCAATCTATCAGACAATTT |                               |
|        |        | 8 | GGCGACTAACGGCGTGCTGACCAGCCAGTCGC |                               |

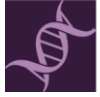

Supplement: ijms-21-01883-s001.pdf [file ijms-21-01883-s001.pdf]
